# Supplementary material for: Targeting Lysosomes to Reverse Hydroquinone-Induced Autophagy Defects and Oxidative Damage in Human Retinal Pigment Epithelial Cells
Source: MDPI journal article supplement (doi:10.3390/ijms22169042), 2021-08-22
Supplement: s1 [file s1]

Supplementary data

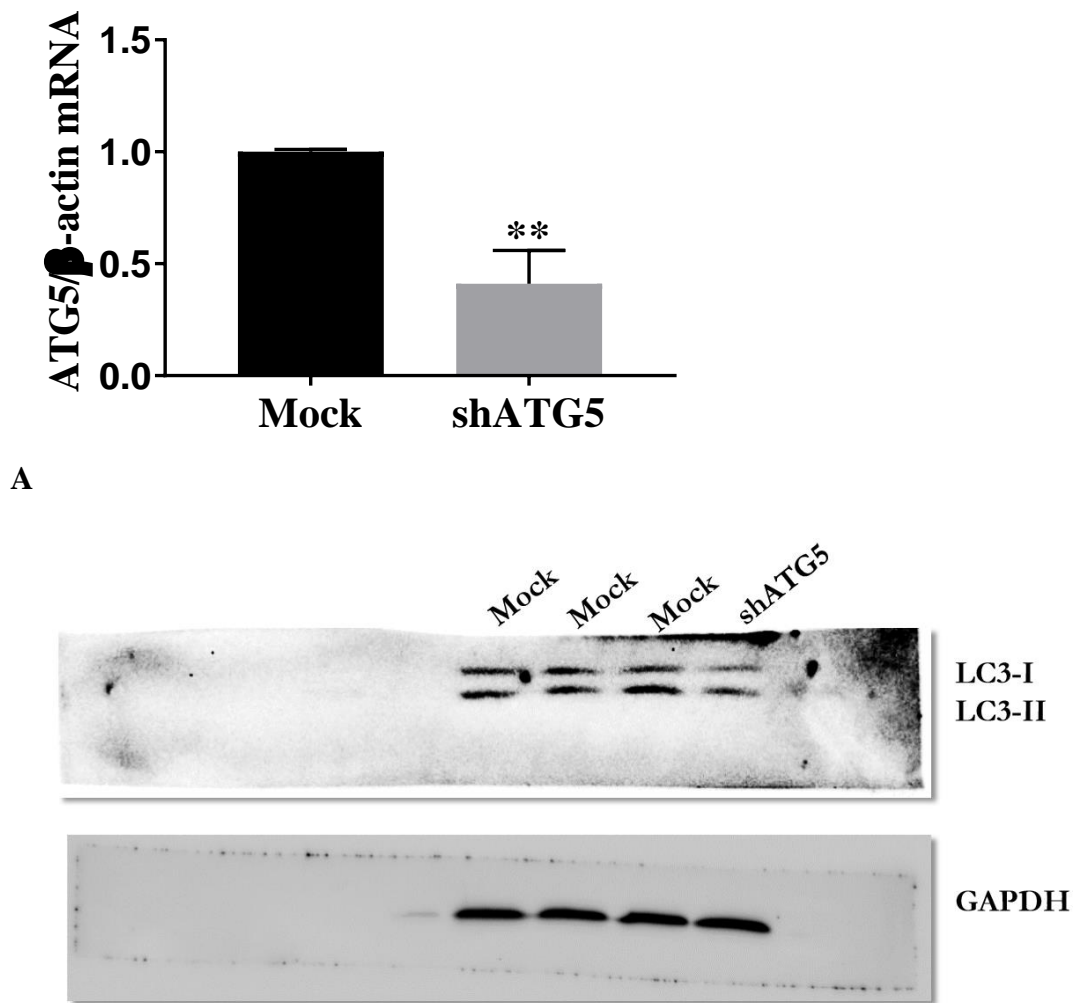

**Figure S1. Transfection of cells with lentivirus particles coding shRNA ATG5 or scrambled RNA.**

(A) Quantitative RT-PCR to quantify ATG5 levels in ARPE-19 cells after transfection.

(B) Immunoblot for LC3-II in whole-cell lysates after transfection.
